# Supplementary material for: The stability of coordination polyhedrons and distribution of europium ions in Ca6BaP4O17
Source: Royal Society of Chemistry journal article supplement (doi:10.1039/d0cp03895d), 2020-01-01
Supplement: d0cp03895d1.pdf [file d0cp03895d1.pdf]

The stabilities of coordination polyhedrons and distributions of europium ions in  $\text{Ca}_6\text{BaP}_4\text{O}_{17}$

Fengkai Ma<sup>a</sup>, Rongfu Zhou<sup>a</sup>, Fang Su<sup>a</sup>, Yiyi Ou<sup>a</sup> and Hongbin Liang<sup>\*a</sup>

<sup>a</sup>MOE Key Laboratory of Bioinorganic and Synthetic Chemistry, KLGHEI of Environment and Energy Chemistry, School of Chemistry, Sun Yat-sen University, Guangzhou, 510275, China

\*cesbin@mail.sysu.edu.cn

### Supporting Information

Table S1. Calculated atomic coordinates for the  $\text{Ca}_6\text{BaP}_4\text{O}_{17}$  (CBPO) crystal using density functional theory (DFT) with the PAW\_PBE (PBE) and USPP\_LDA (LDA), and compared with the reported PAW\_PBE0 (PBE0) and reference (REF) results.[1-2]

| atom | site | methods | <i>x</i> | <i>y</i> | <i>z</i> |
|------|------|---------|----------|----------|----------|
| Ca1  | 4i   | PBE     | 0.7163   | 0.0000   | 0.3087   |
|      |      | LDA     | 0.7176   | 0.0000   | 0.3111   |
|      |      | PBE0    | 0.7165   | 0.0000   | 0.3083   |
|      |      | REF     | 0.7194   | 0.0000   | 0.3117   |
| Ca2  | 8j   | PBE     | 0.0511   | 0.7669   | 0.6927   |
|      |      | LDA     | 0.0514   | 0.7679   | 0.6920   |
|      |      | PBE0    | 0.0509   | 0.7670   | 0.6924   |
|      |      | REF     | 0.0506   | 0.7666   | 0.6930   |
| Ba   | 2a   | PBE     | 0.0000   | 0.0000   | 0.0000   |
|      |      | LDA     | 0.0000   | 0.0000   | 0.0000   |
|      |      | PBE0    | 0.0000   | 0.0000   | 0.0000   |
|      |      | REF     | 0.0000   | 0.0000   | 0.0000   |
| O10  | 2c   | PBE     | 0.0000   | 0.0000   | 0.5000   |
|      |      | LDA     | 0.0000   | 0.0000   | 0.5000   |
|      |      | PBE0    | 0.0000   | 0.0000   | 0.5000   |
|      |      | REF     | 0.0000   | 0.0000   | 0.5000   |

|     |    |      |        |         |         |
|-----|----|------|--------|---------|---------|
| O11 | 4i | PBE  | 0.3908 | 0.0000  | 0.5841  |
|     |    | LDA  | 0.3945 | 0.0000  | 0.5872  |
|     |    | PBE0 | 0.3900 | 0.0000  | 0.5835  |
|     |    | REF  | 0.4013 | 0.0000  | 0.5830  |
| O12 | 8j | PBE  | 0.2870 | -0.1781 | 0.3421  |
|     |    | LDA  | 0.2864 | -0.1798 | 0.3411  |
|     |    | PBE0 | 0.2873 | -0.1773 | 0.3428  |
|     |    | REF  | 0.2831 | -0.1749 | 0.3364  |
| O13 | 4i | PBE  | 0.1114 | 0.0000  | 0.3456  |
|     |    | LDA  | 0.1120 | 0.0000  | 0.3492  |
|     |    | PBE0 | 0.1115 | 0.0000  | 0.3447  |
|     |    | REF  | 0.1208 | 0.0000  | 0.3680  |
| O21 | 4i | PBE  | 0.2919 | 0.0000  | 0.1139  |
|     |    | LDA  | 0.2916 | 0.0000  | 0.1155  |
|     |    | PBE0 | 0.2922 | 0.0000  | 0.1136  |
|     |    | REF  | 0.2877 | 0.0000  | 0.1077  |
| O22 | 4i | PBE  | 0.2423 | 0.0000  | -0.1371 |
|     |    | LDA  | 0.2424 | 0.0000  | -0.1381 |
|     |    | PBE0 | 0.2425 | 0.0000  | -0.1363 |
|     |    | REF  | 0.2432 | 0.0000  | -0.1397 |
| O23 | 8j | PBE  | 0.4680 | -0.1762 | 0.1144  |
|     |    | LDA  | 0.4703 | -0.1782 | 0.1172  |
|     |    | PBE0 | 0.4676 | -0.1752 | 0.1140  |
|     |    | REF  | 0.4620 | -0.1797 | 0.1148  |
| P1  | 4i | PBE  | 0.2664 | 0.0000  | 0.3996  |
|     |    | LDA  | 0.2670 | 0.0000  | 0.4003  |
|     |    | PBE0 | 0.2664 | 0.0000  | 0.3996  |
|     |    | REF  | 0.2664 | 0.0000  | 0.3996  |
| P2  | 4i | PBE  | 0.3658 | 0.0000  | 0.0487  |

|      |        |        |        |
|------|--------|--------|--------|
| LDA  | 0.3669 | 0.0000 | 0.0502 |
| PBE0 | 0.3657 | 0.0000 | 0.0487 |
| REF  | 0.3664 | 0.0000 | 0.0472 |

Table S2. Calculated unit cell dimensions for the CBPO crystal using DFT with the PBE and LDA, and compared with the reported PBE0 and REF results.[1-2]

| Parameters                      | PBE     | LDA     | PBE0    | REF     |
|---------------------------------|---------|---------|---------|---------|
| $a$ (Å)                         | 12.399  | 12.112  | 12.289  | 12.303  |
| $b$ (Å)                         | 7.149   | 6.983   | 7.095   | 7.106   |
| $c$ (Å)                         | 11.820  | 11.518  | 11.716  | 11.716  |
| $\alpha$ (°)                    | 90.000  | 90.000  | 90.000  | 90.000  |
| $\beta$ (°)                     | 134.289 | 134.395 | 134.34  | 134.442 |
| $\gamma$ (°)                    | 90.000  | 90.000  | 90.000  | 90.000  |
| <i>Volume</i> (Å <sup>3</sup> ) | 749.996 | 696.040 | 730.599 | 731.143 |

Table S3. Calculated bond lengths of divalent cations in CBPO using DFT with the PBE and LDA, and compared with the reported PBE0 and REF results.[1-2]

| site | bond    | distance (Å) |       |       |       |
|------|---------|--------------|-------|-------|-------|
|      |         | PBE          | LDA   | PBE0  | REF   |
| Ca1  | Ca1–O10 | 2.526        | 2.454 | 2.499 | 2.473 |
|      | Ca1–O11 | 2.391        | 2.333 | 2.375 | 2.509 |
|      | Ca1–O12 | 2.395        | 2.326 | 2.381 | 2.390 |
|      | Ca1–O12 | 2.395        | 2.326 | 2.381 | 2.390 |
|      | Ca1–O13 | 3.012        | 2.876 | 2.997 | 2.760 |
|      | Ca1–O22 | 2.415        | 2.357 | 2.395 | 2.361 |
|      | Ca1–O23 | 2.543        | 2.479 | 2.520 | 2.598 |
|      | Ca1–O23 | 2.543        | 2.479 | 2.520 | 2.598 |
| Ca2  | Ca2–O10 | 2.520        | 2.445 | 2.497 | 2.506 |
|      | Ca2–O11 | 2.382        | 2.315 | 2.366 | 2.303 |

|    |         |       |       |       |       |
|----|---------|-------|-------|-------|-------|
|    | Ca2-O12 | 2.399 | 2.330 | 2.382 | 2.392 |
|    | Ca2-O12 | 3.058 | 2.977 | 3.021 | 3.075 |
|    | Ca2-O13 | 2.402 | 2.336 | 2.386 | 2.366 |
|    | Ca2-O21 | 2.538 | 2.476 | 2.519 | 2.548 |
|    | Ca2-O22 | 2.405 | 2.340 | 2.387 | 2.388 |
|    | Ca2-O23 | 2.536 | 2.470 | 2.518 | 2.442 |
| Ba | Ba-O12  | 3.247 | 3.158 | 3.218 | 3.160 |
|    | Ba-O12  | 3.247 | 3.158 | 3.218 | 3.160 |
|    | Ba-O12  | 3.247 | 3.158 | 3.218 | 3.160 |
|    | Ba-O12  | 3.247 | 3.158 | 3.218 | 3.160 |
|    | Ba-O13  | 3.274 | 3.222 | 3.233 | 3.438 |
|    | Ba-O13  | 3.274 | 3.222 | 3.233 | 3.438 |
|    | Ba-O21  | 2.847 | 2.769 | 2.826 | 2.804 |
|    | Ba-O21  | 2.847 | 2.769 | 2.826 | 2.804 |
|    | Ba-O23  | 2.845 | 2.771 | 2.828 | 2.844 |
|    | Ba-O23  | 2.845 | 2.771 | 2.828 | 2.844 |
|    | Ba-O23  | 2.845 | 2.771 | 2.828 | 2.844 |
|    | Ba-O23  | 2.845 | 2.771 | 2.828 | 2.844 |

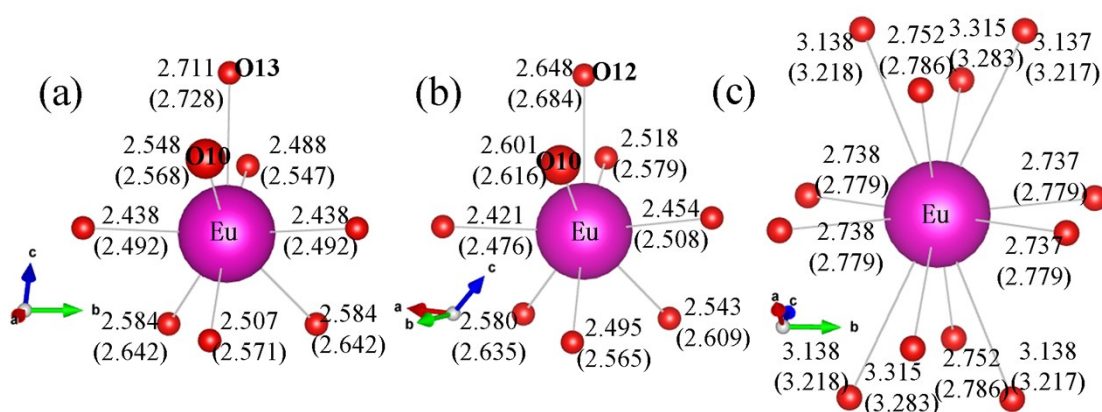

Fig. S1. Coordination geometries of  $\text{Eu}^{2+}$  occupied the Ca1 (a), Ca2 (b) and Ba site (c) relaxed with the potentials of Eu<sub>2</sub> (Eu), in Eu<sub>2</sub> potential the orbitals of  $5p^66s^2$  are treated as the valence electrons, and in Eu potential the  $5s^25p^64f^76s^2$  are as the valence electrons in the calculation. Bond length is in unit of Å.

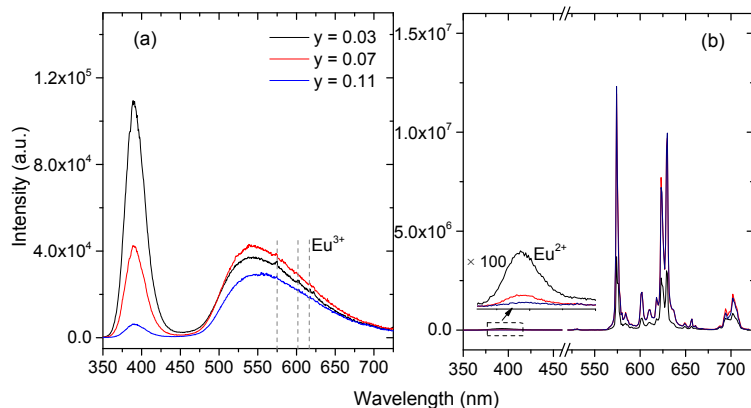

Fig. S2 Room temperature emission spectra of europium-doped CBPO prepared in the reducing ambience (a) and in the air (b), the FLS1000 fluorimeter is used with excitation of a 450 W xenon lamp at 300 nm. The dotted weak sharp lines in (a) are the 4f – 4f transitions of  $\text{Eu}^{3+}$ , and weak broad ones in (b) the 4f – 5d transitions of  $\text{Eu}^{2+}$ .

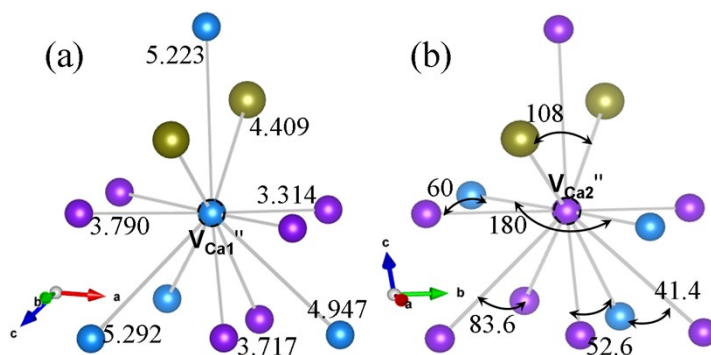

Fig. S3. Divalent cations coordinated structure of Ca1 with maximum bond distance of 5.292 Å, the first cationic shell of Ca1 ion for clear view (a), and of Ca2 site with maximum angle of 180 ° (b). The dotted circles of Ca1 and Ca2 mean that they are vacancies of  $V_{\text{Ca1}}''$  and  $V_{\text{Ca2}}''$ , respectively.

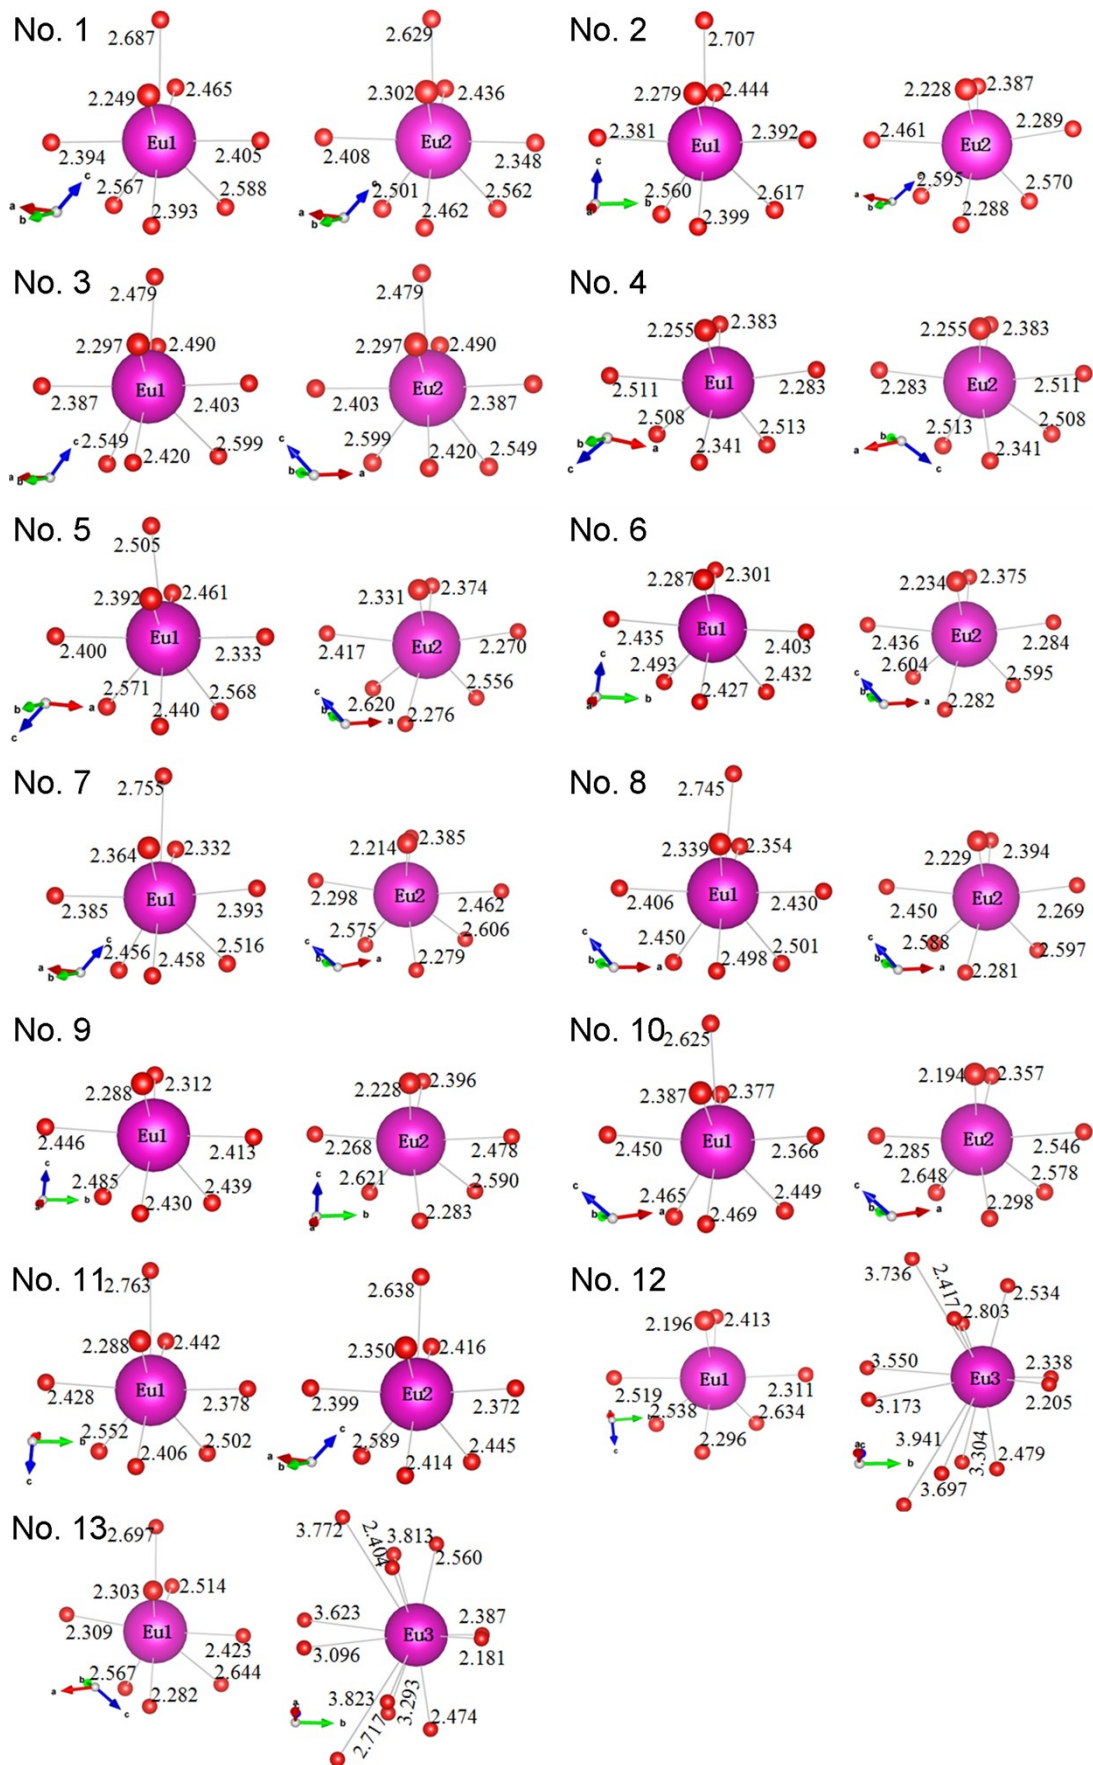

Fig. S4. Relaxed coordination geometries of two  $\text{Eu}^{3+}$  at the divalent cationic sites

with a  $V_{Ca/Ba}''$  vacancy. Nos. 1–13 are case numbers of defect. Eu1 and Eu2 occupy the Ca site, and Eu3 at Ba site. Bond length is in unit of Å.

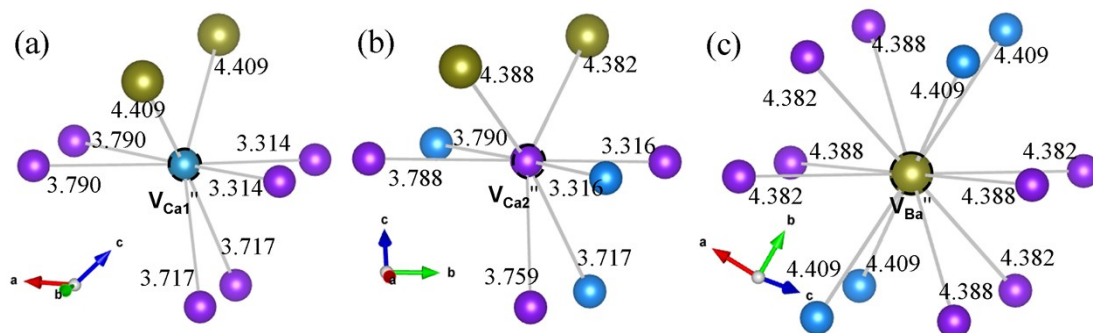

Fig. S5. The nearest divalent cations coordinated structure of Ca1 with maximum bond distance of 4.409 Å (a), of Ca2 with 4.388 Å (b) and of Ba with 4.409 Å (c). The dotted circles of Ca1, Ca2 and Ba mean that they are vacancies of  $V_{Ca1}''$ ,  $V_{Ca2}''$  and  $V_{Ba}''$ , respectively.

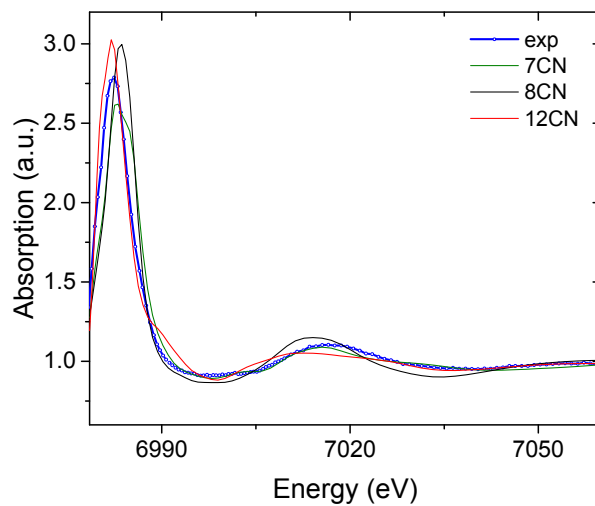

Fig. S6. Calculated XANES spectra of  $Eu^{3+}$  in the sites of 7CN, 8CN and 12CN, and compared with the experiment line of CBPO:  $Eu^{3+}$  ( $y = 0.07$ ).

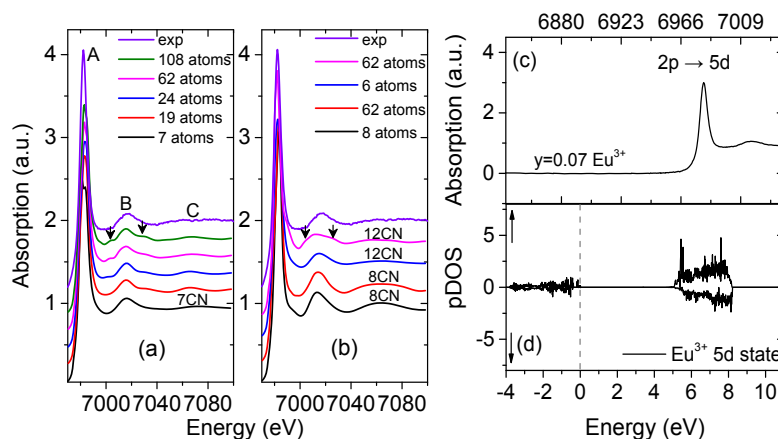

Fig. S7. Calculated XANES spectra of 7CN (a), 8CN and 12CN (b) with varied cluster sizes and compared with the experimental line, A, B, C and arrows denoted the peaks; (c) and (d) respectively the absorption spectra of CBPO:  $\text{Eu}^{3+}$  ( $y = 0.07$ ) and pDOS of 5d state. Dotted line is the Fermi level.

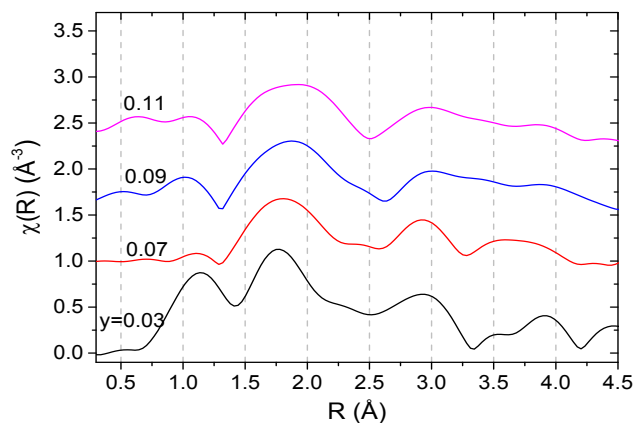

Fig. S8. Pair distribution function (PDF) of CBPO:  $\text{Eu}^{3+}$  with no phase correction.

Table S4. The varied bond length of  $\text{Eu1}_{\text{Ca1}}\text{-O13}$  in center No. 6, and the corresponding averaged bond length of first anionic shell of  $\text{Eu}^{3+}$  at the site of Ca1.

| Bond length ( $\text{\AA}$ )      |       |       |
|-----------------------------------|-------|-------|
| $\text{Eu1}_{\text{Ca1}}\text{-}$ | ABL   |       |
|                                   | 7CN   | 8CN   |
| O13                               | 2.674 | 2.461 |



|       |       |       |
|-------|-------|-------|
| 2.876 |       | 2.473 |
| 3.076 | 2.404 | 2.488 |
| 3.176 | 2.399 |       |
| 3.228 | 2.397 |       |
| 3.329 | 2.394 |       |
| 3.379 | 2.392 |       |

---

## References

- [1] L.X. Ning, X.X. Huang, J.C. Sun, S.Z. Huang, M.Y. Chen, Z.G. Xia, Y.C. Huang, Effects of Si codoping on optical properties of Ce-doped  $\text{Ca}_6\text{BaP}_4\text{O}_{17}$ : insights from first-principles calculations, *J. Phys. Chem. C* 120 (2016) 3999-4006. <https://doi.org/10.1021/acs.jpcc.5b11659>.
- [2] N. Komuro, M. Mikami, Y. Shimomura, E.G. Bithell, A.K. Cheetham, Synthesis, structure and optical properties of europium doped calcium barium phosphate-a novel phosphor for solid-state lighting, *J. Mater. Chem. C* 2 (2014) 6084-6089. <https://doi.org/10.1039/C4TC00732H>.
